# Supplementary material for: Contamination and Health Risk Assessment of Multiple Mycotoxins in Edible and Medicinal Plants
Source: MDPI journal article supplement (doi:10.3390/toxins15030209), 2023-03-10
Supplement: s1 [file s1]

**Table S1.** MRM transitions and collision energies for UHPLC–MS/MS analysis of 15 mycotoxins.

| Mycotoxin        | Precursor ion (m/z) | Product ion (Quantifier, m/z) | CE (V) | Product ion (Qualifier, m/z) | CE (V) | Retention time (min) | ESI mode |
|------------------|---------------------|-------------------------------|--------|------------------------------|--------|----------------------|----------|
| AFB <sub>1</sub> | 313.00              | 285.00                        | -24    | 241.00                       | -38    | 4.7                  | +        |
| AFB <sub>2</sub> | 315.00              | 259.00                        | -30    | 287.00                       | -27    | 4.5                  | +        |
| AFG <sub>1</sub> | 329.00              | 243.00                        | -29    | 311.00                       | -29    | 4.4                  | +        |
| AFG <sub>2</sub> | 331.00              | 245.00                        | -31    | 257.00                       | -31    | 4.2                  | +        |
| DON              | 297.15              | 249.10                        | -11    | 231.10                       | -12    | 2.7                  | +        |
| FB <sub>1</sub>  | 722.40              | 352.30                        | -34    | 334.15                       | -41    | 4.8                  | +        |
| FB <sub>2</sub>  | 706.40              | 336.25                        | -42    | 318.25                       | -41    | 5.3                  | +        |
| T-2              | 489.05              | 245.05                        | -25    | 326.95                       | -22    | 5.4                  | +        |
| HT-2             | 447.10              | 285.10                        | -20    | 105.10                       | -48    | 5.1                  | +        |
| OTA              | 404.10              | 239.00                        | -22    | 358.10                       | -13    | 5.7                  | +        |
| ZEN              | 317.10              | 175.20                        | 24     | 131.10                       | 29     | 5.8                  | –        |
| ZAN              | 319.37              | 275.25                        | 22     | 205.20                       | 23     | 5.7                  | –        |
| $\alpha$ -ZEL    | 319.15              | 160.15                        | 32     | 130.05                       | 35     | 5.7                  | –        |
| $\beta$ -ZEL     | 319.15              | 160.15                        | 31     | 130.05                       | 35     | 5.7                  | –        |
| $\beta$ -ZAL     | 321.15              | 277.20                        | 23     | 107.05                       | 34     | 5.2                  | –        |

**Table S2.** Sampling of Coix Seed, Malt, Lotus Seed and Lillii Bulbus from their main producing area in China.

| Province     | No. of sample | Mean temperature (°C) | Mean relative humidity (%) | Latitudes (N) |
|--------------|---------------|-----------------------|----------------------------|---------------|
| Heilongjiang | 9             | 4.0                   | 70                         | 43°26'~53°33' |
| Hebei        | 25            | 14.2                  | 62                         | 36°01'~42°37' |
| Gansu        | 5             | 14.8                  | 56                         | 32°31'~42°57' |
| Jiangsu      | 6             | 16.8                  | 76                         | 30°45'~35°08' |
| Anhui        | 16            | 17.2                  | 77                         | 29°41'~34°38' |
| Fujian       | 5             | 20.6                  | 77                         | 23°30'~28°22' |
| Jiangxi      | 5             | 17.7                  | 78                         | 24°29'~30°04' |
| Hunan        | 10            | 18.5                  | 79                         | 24°38'~30°08' |
| Guizhou      | 32            | 16.4                  | 80                         | 24°37'~29°13' |
| Sichuan      | 5             | 15.4                  | 79                         | 26°03'~34°19' |
| Yunnan       | 9             | 15.0                  | 74                         | 21°08'~29°15' |
| Total        | 127           |                       |                            |               |

**Table S3.** Concentrations of the mixed standard working solutions of 15 mycotoxins.

| Mycotoxin        | Concentration (ng/mL) |      |     |      |     |      |
|------------------|-----------------------|------|-----|------|-----|------|
|                  | 1                     | 2    | 3   | 4    | 5   | 6    |
| AFB <sub>1</sub> | 0.25                  | 0.5  | 1   | 2.5  | 5   | 10   |
| AFB <sub>2</sub> | 0.075                 | 0.15 | 0.3 | 0.75 | 1.5 | 3    |
| AFG <sub>1</sub> | 0.25                  | 0.5  | 1   | 2.5  | 5   | 10   |
| AFG <sub>2</sub> | 0.075                 | 0.15 | 0.3 | 0.75 | 1.5 | 3    |
| DON              | 37.5                  | 75   | 150 | 375  | 750 | 1500 |
| FB <sub>1</sub>  | 5                     | 10   | 20  | 50   | 100 | 200  |
| FB <sub>2</sub>  | 2.5                   | 5    | 10  | 25   | 50  | 100  |
| T-2              | 0.5                   | 1    | 2   | 5    | 10  | 20   |
| HT-2             | 2.5                   | 5    | 10  | 25   | 50  | 100  |
| OTA              | 0.5                   | 1    | 2   | 5    | 10  | 20   |
| ZEN              | 5                     | 10   | 20  | 50   | 100 | 200  |
| ZAN              | 5                     | 10   | 20  | 50   | 100 | 200  |
| $\alpha$ -ZEL    | 5                     | 10   | 20  | 50   | 100 | 200  |
| $\beta$ -ZEL     | 5                     | 10   | 20  | 50   | 100 | 200  |
| $\beta$ -ZAL     | 5                     | 10   | 20  | 50   | 100 | 200  |

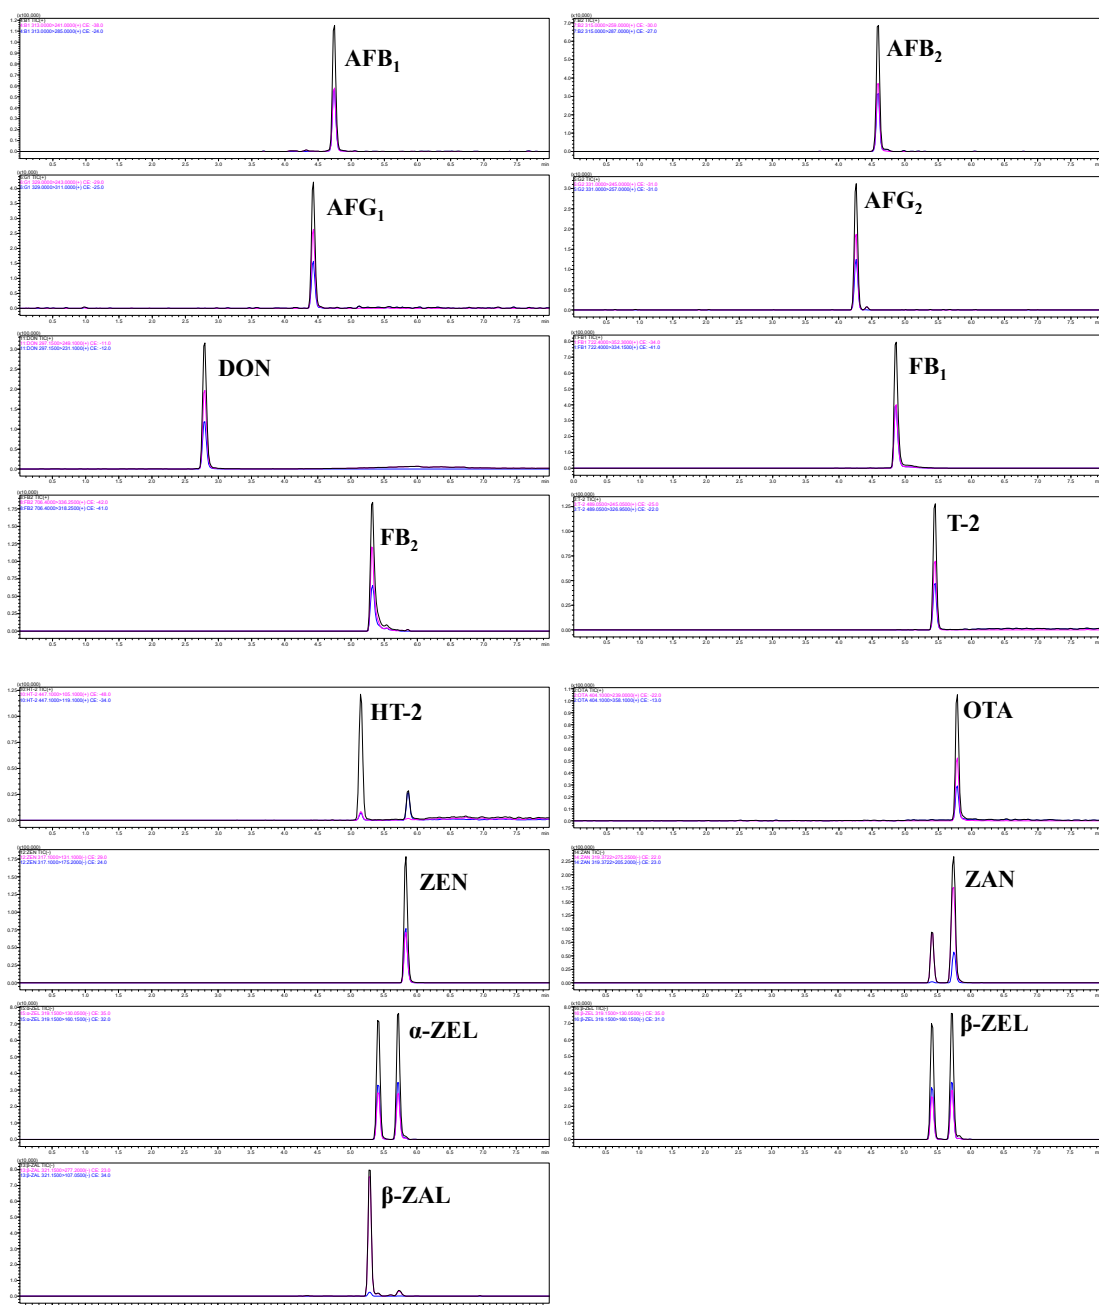

**Figure S1.** UHPLC–MS/MS chromatograms of 15 mycotoxins: AFB<sub>1</sub> and AFG<sub>1</sub>, 10 ng/mL; AFB<sub>2</sub> and AFG<sub>2</sub>, 3 ng/mL; DON, 500 ng/mL; FB<sub>1</sub>, FB<sub>2</sub>, HT-2, ZEN, ZAN, α-ZEL, β-ZEL and β-ZAL, 200 ng/mL; T-2 and OTA, 20 ng/mL.
